# Supplementary material for: A Community partner engagement method to inform adaptation of multicomponent hypertension control program in Ghana: A mixed methods study
Source: Research Square preprint supplement (doi:10.21203/rs.3.rs-8138061/v1), 2025-12-19
Supplement: Supplementary file 4 [file Supplemental Table 2_17Nov25.xlsx]

## Sheet: Determinants x Strategies
Supplemental Table 3. Matrix linking determinants and strategies
		Discret Strategies
CFIR Domain	Determinant	A	B	C	D	E	F	G	H	I	J	K	L	M	N	O	P	Q	R	S	T	U	V	W
		Expand CHPS compounds and PHCs (Health facility & service expansion)	Routine & community-based BP screening (Health facility & service expansion)	Integrate hypertension care into existing system (Health facility & service expansion)	Integrate traditional healers into the formal system (Health facility & service expansion)	Telemedicine for remote care (Health facility & service expansion)	Routine BP screening at PHCs (Health facility & service expansion)	Provider training & capacity building (Workforce strengthening & task optimization)	Task-shifting/role optimization for CHNs (Workforce strengthening & task optimization)	Provider recruitment & retention (Workforce strengthening & task optimization)	Authorize CHN HTN medication prescriptions (Workforce strengthening & task optimization)	Integrate CHN follow-ups in care (Workforce strengthening & task optimization)	Standardize & simplify HTN guidelines (Quality assurance, protocols, & data systems)	Promote protocol adherence (training/supervision/engagement) (Quality assurance, protocols, & data systems)	Automate BP control reporting in workflows (Quality assurance, protocols, & data systems)	Use BP data for team review & leadership decisions (Quality assurance, protocols, & data systems)	Policy advocacy & insurance for essential HTN meds (Policy, financing & supply chain)	Incentivize CHN role expansion (Policy, financing & supply chain)	Promote access to safe combination therapies (Policy, financing & supply chain)	Strengthen combination therapy supply chain (Policy, financing & supply chain)	Hypertension registry (Adapted Kaiser bundle tools & processes)	Distribute community-informed BP control guidelines (Adapted Kaiser bundle tools & processes)	Distribute BP control reports (Adapted Kaiser bundle tools & processes)	Physician-supervised CHN follow-up visits (Adapted Kaiser bundle tools & processes)
Outer Setting	High rates of hypertension (-)	x		x				x	x	x											x		x	x
	Poor access to care, geographic and logistics, distance, work, facility crowding (-)	x	x			x			x															x
	Socio-cultural beliefs and misinformation about HTN (-)		x		x																			x
	Low hypertension awareness (-)		x	x	x																x	x		x
	Limited government funding (-)					x											x	x		x
	Lack of community-level BP screening logistics (-)		x						x												x			x
	Lack of performance incentives for healthcare providers (-)
	Shortage of BP medications (-)																x		x
	Supply chain constraints (-)																	x	x	x
	Proximity of healthcare facilities (+)
	Community pharmacies rendering BP screening services (+)
	Community BP screenings organized routinely by some health facilities (+)
	BP screening and hypertension awareness programs often organized by some CSOs in the community (+)
Inner Setting	Remote BP monitoring (-)	x	x			x															x	x
	Busy and complicated workflows (-)	x	x	x									x		x						x			x
	Uncoordinated hypertension registries (-)		x					x	x				x	x
	Availability of hypertension clinic in PHCs (-)		x	x									x	x
	Misdiagnosis, under-diagnosis (-)		x	x					x	x			x	x			x				x	x
	Poor healthcare provider attitudes/communication (-)							x
	Shortage of skilled providers for BP screening, HTN guidelines, BP control report and single pill prescriptions (-)							x	x	x			x	x	x
	Poor data quality or missing data (-)							x	x					x	x	x					x	x
	Administrative burden (-)									x					x
	Inadequate supervision and accountability (-)															x							x
	High workload and time constraints (-)								x	x	x													x
	Availability of BP screening in all facilities (at point of entry or triaging\) (+)
Individuals	Limited knowledge of BP readings (-)		x									x
	Limited resources to purchase medications (-)																x
	Enthusiasm on the part of caregivers – they are willing and learning how to check for BP (+)
	High interest of patients and caregivers in understanding their condition (+)
Implementation Process: Implementer-level (PHC)	Antihypertensive medication prescribing (-)		x						x		x	x					x				x			x
	Poor communication with patients on behavior change (-)		x					x	x									x
	Lack of leadership support (-)												x	x	x	x
	HCPs having the requisite knowledge for earmarking (identifying & diagnosing\) patients with high BPs (+)
	Comorbid health concerns (-)	x		x
	Health seeking behaviors (-)	x			x
	Un\-insured (-)																x
	Perceived insusceptibility to hypertension risk (-)	x	x		x
	Financial barrier opportunity cost of missing work (-)	x
	Medical mistrust (-)		x		x																		x
	Medication hesitancy (-)		x		x																			x
	Attitude towards medical check-up (-)		x	x	x																			x
	Patients' willingness to participate in BP screening activities (+)
